# Supplementary material for: Stability Determination of Intact Humanin-G with Characterizations of Oxidation and Dimerization Patterns
Source: MDPI journal article supplement (doi:10.3390/biom13030515), 2023-03-11
Supplement: s1 [file s1]

**Table S4.** Amino acid sequences and mass spectrometric analytical properties of HNG in MO formulation at 11 months. Dimerized HNG and dimerized HNG fragments are ordered by intensity (counts).

| Peptide                     | Label                 | Modifier  | RT (Min) | Control Charge State | Control m/z | Control Mass (Da) | Control Intensity (Counts) | Control b/y Found | Control b/y List                                                                                                                                                             |
|-----------------------------|-----------------------|-----------|----------|----------------------|-------------|-------------------|----------------------------|-------------------|------------------------------------------------------------------------------------------------------------------------------------------------------------------------------|
| MAPRGFSCLLLLTGEIDLPVKRRA    | 1:F001-024            | N.D.      | 22.5     | 4                    | 664.8777    | 2655.479          | 13653190                   | 36                | b2;b3;b4;b5;b6;b7;b8;b9;b10;b11;b12;b13;b14;b15;b16;b17;b18;b23;y2;y3;y4;y5;y6;y7;y8;y9;y10;y11;y12;y13;y14;y15;y17;y18;y22;y23                                              |
| MAPRGFSCLLLLTG=CLLLLLTGEIDL | 1:F001-014-2:F008-018 | N.D.      | 22.5     | 3                    | 893.4903    | 2677.447          | 861882                     | 24                | 1/y2;1/y3;1/y4;1/y6;1/y7;1/y7-2/y11;1/y8;1/y11-2/b12;1/y11-2/b13;1/y11-2/y13;1/y11-2/y10;1/y11-2/y9;1/y11-2/y11;1/y14-2/b1;2/b2;2/b3;2/b4;2/b5;2/b6;2/b7;2/y2;2/y3;2/y5;2/y6 |
| TGEIDLPVKRRA                | 1:F013-024            | N.D.      | 22.5     | 2                    | 677.8936    | 1353.7712         | 538818                     | 17                | b2;b3;b4;b5;b6;b9;b10;b11;y2;y3;y4;y5;y6;y7;y8;y9;y10                                                                                                                        |
| SCLLLLTGEIDLPVK=CLLLLLTGEID | 1:F007-021-2:F008-017 | N.D.      | 22.5     | 3                    | 900.8174    | 2699.4285         | 406213                     | 19                | 1/b8-2/y15;1/y2;1/y3;1/y6;1/y7;1/y8;1/y10-2/b12;1/y10-2/b2;1/y10-2/b6;1/y10-2/b8;1/y15-2/b2;1/y15-2/b9;1/y15-2/b3;2/y2;2/y3;2/y6;2/y9;2/y10;2/y12                            |
| MAPRGFSCLLLLTGEID=CLLLLLTGE | 1:F001-017-2:F008-015 | N.D.      | 22.5     | 4                    | 674.3619    | 2693.4158         | 381001                     | 20                | 1/b7-2/y17;1/y2;1/y3;1/y4;1/y6;1/y8-2/y16;1/y8-2/b8;1/y8-2/b15;1/y15-2/y8;2/b2;2/b3;2/b4;2/b5;2/b6;2/b7;2/y2;2/y3;2/y6;2/y7;2/y8                                             |
| GEIDLPVKRRA                 | 1:F014-024            | N.D.      | 22.5     | 2                    | 627.3705    | 1252.7252         | 326385                     | 16                | b2;b3;b4;b5;b6;b7;b9;b10;y2;y3;y4;y5;y6;y8;y9;y10                                                                                                                            |
| MAPRGFSCLLLLTGEIDLPVKRRA    | 1:F001-024            | N.D.      | 21.9     | 4                    | 664.8751    | 2655.4688         | 282660                     | 25                | b2;b3;b4;b5;b7;b8;b9;b10;b11;b12;b13;b17;y2;y6;y7;y8;y9;y10;y11;y12;y13;y14;y15;y22;y23                                                                                      |
| LTGEIDLPVKRRA               | 1:F012-024            | N.D.      | 22.5     | 2                    | 734.4359    | 1466.856          | 223774                     | 16                | b2;b3;b4;b6;b7;b11;b12;y2;y3;y4;y5;y6;y8;y9;y10;y12                                                                                                                          |
| FSCLLLL=FSCLLLLTGEIDLPVKR   | 1:F006-012-2:F006-022 | N.D.      | 22.5     | 3                    | 908.1447    | 2721.4102         | 205875                     | 16                | 1/b2;1/y2;1/y4;1/y7-2/b4;1/y7-2/b8;1/y7-2/b6;1/y7-2/b3;1/y7-2/b9;1/y7-2/b7;2/y1;2/y2;2/y3;2/y5;2/y9;2/y11;2/y14                                                              |
| MAPRGFSCLLLLTGEIDLPVKRRA    | 1:F001-024*           | Oxidation | 22.1     | 4                    | 668.8735    | 2671.4622         | 169399                     | 19                | b6*;b7*;b8*;b9*;b10*;b11*;b12*;b13*;y                                                                                                                                        |

| M(1)                               |                           |      |      |   |           |           |        |    | 2;y6;y7;y8;y9;y10;y11;y12;y13;y14;y15                                                                                                                                                   |
|------------------------------------|---------------------------|------|------|---|-----------|-----------|--------|----|-----------------------------------------------------------------------------------------------------------------------------------------------------------------------------------------|
| <b>PRGFSCLLLLTG=CLLLLTGEIDLPV</b>  | 1:F003-014-<br>2:F008-020 | N.D. | 22.1 | 4 | 668.8735  | 2671.4622 | 169399 | 5  | 1/y2;1/y3;1/y11;2/b2;2/b4                                                                                                                                                               |
| <b>APRGFSCLL</b>                   | 1:F002-010                | N.D. | 22.5 | 1 | 963.4548  | 962.4469  | 147884 | 9  | b2;b3;b4;b6;b7;b8;y2;y3;y8                                                                                                                                                              |
| <b>APRGFSCLLL</b>                  | 1:F002-011                | N.D. | 22.5 | 1 | 1076.5399 | 1075.532  | 140315 | 12 | b2;b3;b4;b6;b7;b8;b9;y2;y5;y6;y7;y9                                                                                                                                                     |
| <b>GFSC=PRGFSC</b>                 | 1:F003-008-<br>2:F005-008 | N.D. | 22.5 | 1 | 1076.5399 | 1075.532  | 140315 | 6  | 1/b2;1/b3;2/b2;2/b3;2/b4;2/b5                                                                                                                                                           |
| <b>LLTGEIDLPVKRRA</b>              | 1:F011-024                | N.D. | 22.5 | 2 | 790.9772  | 1579.9386 | 85221  | 12 | b2;b4;b6;b7;b11;b13;y2;y3;y4;y5;y8;y12                                                                                                                                                  |
| <b>APRGFSC</b>                     | 1:F002-009                | N.D. | 22.5 | 1 | 850.3707  | 849.3628  | 84132  | 9  | b2;b3;b4;b6;b7;y2;y3;y5;y7                                                                                                                                                              |
| <b>MAPRGFSCLLLLLTGEIDLPV=CLLLL</b> | 1:F001-020-<br>2:F008-012 | N.D. | 22.5 | 3 | 906.1381  | 2715.3904 | 81223  | 17 | 1/b18-2/y5;1/y2;1/y4;1/y5-2/b9;1/y5-2/b11;1/y19-2/y5;2/b2;2/b3;2/b4;2/b5;2/b6;2/b7;2/y2;2/y7;2/y10;2/y11;2/y12                                                                          |
| <b>APRGFSC=FSCLLLLTGEIDLPVKRR</b>  | 1:F002-008-<br>2:F006-023 | N.D. | 22.5 | 3 | 936.4689  | 2806.3828 | 80813  | 26 | 1/b2;1/b3;1/b4;1/b6;1/y7-2/b11;1/y7-2/b9;1/y7-2/y16;1/y7-2/b10;1/y7-2/b16;1/y7-2/b6;1/y18-2/y2;2/b2;2/y1;2/y2;2/y3;2/y4;2/y5;2/y6;2/y7;2/y8;2/y9;2/y10;2/y11;2/y12;2/y13;2/y14          |
| <b>RGFSCLLLLLTGEI=PRGFSCLLLLLT</b> | 1:F003-013-<br>2:F004-016 | N.D. | 22.5 | 5 | 528.4999  | 2637.4597 | 79623  | 18 | 1/b2;1/b3;1/b4;1/b5;1/y1;1/y2;1/y3;1/y4;1/y5;1/y11-2/b7;1/y13-2/b10;2/b1;2/b2;2/b3;2/b4;2/y3;2/y4;2/y6                                                                                  |
| <b>APRGFSCLLLL</b>                 | 1:F002-012                | N.D. | 22.5 | 2 | 595.3155  | 1188.6151 | 72797  | 12 | b2;b3;b4;b6;b7;b8;b9;b10;y2;y4;y5;y10                                                                                                                                                   |
| <b>RGFSCLLL=CLLLLTGEIDLPVKRR</b>   | 1:F004-011-<br>2:F008-023 | N.D. | 22.5 | 3 | 915.4716  | 2743.3909 | 67423  | 24 | 1/b7-2/y8;1/y1;1/y2;1/y3;1/y4;1/y5;1/y6;1/y7;1/y8-2/b3;1/y8-2/b2;1/y8-2/b5;1/y8;2/b10;1/y9;1/y10;1/y11;1/y12;1/y13;1/y14;2/b1;2/b2;2/b3;2/b4;2/y2                                       |
| <b>FSCLLL=FSCLLLLTGEIDLPVKRR</b>   | 1:F006-011-<br>2:F006-023 | N.D. | 22.5 | 3 | 922.4716  | 2764.3909 | 53817  | 25 | 1/b2;1/y2;1/y6-2/b16;1/y6-2/b14;1/y6-2/b5;1/y6-2/b7;1/y6-2/b8;1/y6-2/b4;1/y6-2/b9;1/y6-2/b3;1/y6-2/b12;1/y18-2/b5;2/y1;2/y2;2/y3;2/y4;2/y5;2/y7;2/y8;2/y9;2/y10;2/y11;2/y12;2/y13;2/y14 |

|                                     |                           |                                         |      |   |          |           |       |    |                                                                                                                                                                     |
|-------------------------------------|---------------------------|-----------------------------------------|------|---|----------|-----------|-------|----|---------------------------------------------------------------------------------------------------------------------------------------------------------------------|
| <b>FSCLLLLTGEIDLPVK=CLLLLLTGEI</b>  | 1:F006-021-<br>2:F008-016 | N.D.                                    | 22.5 | 4 | 683.8488 | 2731.3633 | 52020 | 19 | 1/b4-2/y9;1/b5-2/y9;1/y3;1/y4;1/y6;1/y9-2/b13;1/y9-2/b12;1/y9-2/y15;1/y9-2/b14;1/y9-2/b6;1/y16-2/b8;1/y16-2/b3;2/b2;2/y2;2/y3;2/y6;2/y9;2/y10;2/y12                 |
| <b>PRGFSCLLLLTGEIDLPVK=CLLLLLTG</b> | 1:F003-021-<br>2:F008-014 | N.D.                                    | 22.5 | 3 | 934.1256 | 2799.353  | 42594 | 20 | 1/y2;1/y3;1/y5;1/y6;1/y7-2/y14;1/y7-2/y17;1/y7-2/b11;1/y7-2/b9;1/y7-2/b8;1/y7-2/y18;2/b2;2/b3;2/b4;2/b5;2/y2;2/y3;2/y6;2/y9;2/y10;2/y12                             |
| <b>GFSCLL=APRGFSCLLLLTGEIDLPVK</b>  | 1:F002-021-<br>2:F005-010 | N.D.                                    | 22.5 | 3 | 926.7966 | 2777.366  | 38857 | 18 | 1/b2;1/b3;1/b4;1/b6;1/y2;1/y3;1/y6-2/b15;1/y6-2/b11;1/y6-2/b12;1/y6;1/y10;1/y12;1/y16-2/y6;1/y17-2/y6;1/y20-2/y3;2/b2;2/b3;2/y2                                     |
| <b>MAPRGFSCLLLLTGEIDLPVKRRA</b>     | 1:F001-024*               | Oxidation<br>C(1),<br>Oxidation<br>M(1) | 23.5 | 4 | 672.8715 | 2687.4543 | 38795 | 11 | b8*;b9*;b10*;b11*;y7;y9;y11;y12;y13;y14;y16                                                                                                                         |
| <b>EIDLPVKRRA</b>                   | 1:F015-024                | N.D.                                    | 22.5 | 2 | 598.859  | 1195.7021 | 38403 | 12 | b1;b2;b3;b4;b5;b6;b7;b9;y2;y3;y4;y5                                                                                                                                 |
| <b>APRGFSCLLLLTGEIDLPVKRR</b>       | 1:F002-023                | N.D.                                    | 22.5 | 4 | 614.355  | 2453.3882 | 36440 | 23 | b2;b3;b4;b6;b7;b11;b12;b14;b15;b16;y1;y2;y3;y4;y5;y7;y8;y9;y10;y12;y13;y14;y17                                                                                      |
| <b>GFSCLLLLTGEIDL=APRGFSCLL</b>     | 1:F002-010-<br>2:F005-018 | N.D.                                    | 22.5 | 4 | 614.355  | 2453.3882 | 36440 | 18 | 1/b2;1/b3;1/b4;1/b6;1/y2;1/y9-2/b12;1/y9-2/b8;1/y9-2/y13;1/y9-2/b9;1/y14-2/y4;2/b2;2/b3;2/y2;2/y3;2/y4;2/y6;2/y7;2/y8                                               |
| <b>APRGFSCLL=CLLLLLTGEIDLPVKRRA</b> | 1:F002-010-<br>2:F008-024 | N.D.                                    | 22.5 | 3 | 957.4662 | 2869.375  | 35924 | 21 | 1/b2;1/b3;1/b3-2/y9;1/b4;1/b4-2/y9;1/b6;1/y2;1/y9-2/b2;1/y9-2/b7;1/y9-2/b1;1/y9-2/b14;1/y9-2/b5;1/y9-2/b6;1/y9-2/b16;2/y2;2/y3;2/y4;2/y5;2/y12;2/y14;2/y15          |
| <b>APRGFSCLLLLTGEIDLPVKR=CLLL</b>   | 1:F002-022-<br>2:F008-011 | N.D.                                    | 22.5 | 3 | 919.4655 | 2755.3728 | 33480 | 21 | 1/b2;1/b3;1/b4;1/b6;1/b9-2/y4;1/y1;1/y2;1/y3;1/y4-2/b14;1/y4-2/b7;1/y4-2/b8;1/y4-2/b19;1/y4-2/y16;1/y4-2/b11;1/y4-2/y17;1/y4-2/b12;1/y4-2/b10;1/y9;1/y11;1/y14;2/y2 |

|                                     |                           |      |      |   |          |           |       |    |                                                                                                                                                                                  |
|-------------------------------------|---------------------------|------|------|---|----------|-----------|-------|----|----------------------------------------------------------------------------------------------------------------------------------------------------------------------------------|
| <b>IDLPVKRRA</b>                    | 1:F016-024                | N.D. | 22.5 | 2 | 534.3372 | 1066.6584 | 32544 | 10 | b2;b3;b4;b5;b6;b8;y2;y3;y4;y5                                                                                                                                                    |
| <b>RGFSC=FSCLLLLTGEIDLPVKRRA</b>    | 1:F004-008-<br>2:F006-024 | N.D. | 22.5 | 5 | 542.8846 | 2709.3833 | 28739 | 17 | 1/b2;1/y2;1/y3;1/y4;1/y5-2/b10;1/y5-2/b4;1/y5;1/y5-2/b8;1/y5-2/b9;1/y12;1/y14;1/y15;1/y18-2/y5;2/b1;2/b2;2/b3;2/b4                                                               |
| <b>DLPVKRRA</b>                     | 1:F017-024                | N.D. | 22.5 | 2 | 477.7956 | 953.5754  | 27883 | 7  | b2;b3;b4;y2;y3;y4;y5                                                                                                                                                             |
| <b>GFSCLLL=FSCLLLLTGEIDLPVKRR</b>   | 1:F005-011-<br>2:F006-023 | N.D. | 22.5 | 3 | 941.4539 | 2821.3379 | 24877 | 24 | 1/b2;1/b16-2/y7;1/y1;1/y2;1/y3;1/y4;1/y5;1/y7-2/b6;1/y7-2/b7;1/y7;1/y7-2/b3;1/y7-2/b5;1/y7-2/b8;1/y7-2/b4;1/y8;1/y9;1/y10;1/y12;1/y13;1/y14;1/y18-2/b4;2/b2;2/b3;2/y2            |
| <b>GFSCLLLLTGEID=RGFSCLLLLTGEID</b> | 1:F004-017-<br>2:F005-017 | N.D. | 22.5 | 3 | 972.1198 | 2913.3354 | 24619 | 12 | 1/b2;1/b3;1/y2;1/y3;1/y7;2/b2;2/b3;2/b4;2/y6;2/y10-1/y14;2/y13-1/b5;2/y13-1/b13                                                                                                  |
| <b>MAPRGFSCLLLLTG=CLLLLLTGEIDL</b>  | 1:F001-014-<br>2:F008-018 | N.D. | 21.9 | 3 | 893.4889 | 2677.4429 | 24322 | 6  | 1/y11-2/y13;2/b2;2/b3;2/b4;2/b5;2/b7                                                                                                                                             |
| <b>APRGFSCLLLLTGEIDLPVKRRA</b>      | 1:F002-024                | N.D. | 22.5 | 4 | 632.1148 | 2524.4275 | 24126 | 18 | b2;b3;b4;b6;b11;b12;b14;b15;b16;y2;y3;y4;y5;y12;y14;y15;y17;y18                                                                                                                  |
| <b>MAPRGFSCLLLL=FSCLLLLTGEIDLP</b>  | 1:F001-012-<br>2:F006-019 | N.D. | 22.5 | 3 | 951.1242 | 2850.3489 | 23441 | 21 | 1/b2;1/b10-2/y14;1/y2;1/y3;1/y5-2/y14;1/y6;1/y7-2/y14;1/y7;1/y8;1/y9;1/y12-2/b11;1/y12-2/b12;1/y12-2/b6;2/b2;2/b3;2/b4;2/b5;2/b6;2/b7;2/y2;2/y4                                  |
| <b>RGFSCLLLL=MAPRGFSCLLLLTGEI</b>   | 1:F001-016-<br>2:F004-012 | N.D. | 22.5 | 3 | 913.8018 | 2738.3816 | 23023 | 20 | 1/b2;1/b3;1/b4;1/b5;1/b6;1/b7;1/y3;1/y4;1/y6;1/y9-2/b11;1/y9-2/b13;1/y9-2/b8;1/y9-2/y9;1/y16-2/y6;2/b1;2/b2;2/b3;2/b4;2/y2;2/y4                                                  |
| <b>GFSCLLLL=FSCLLLLTGEIDLPVKRR</b>  | 1:F005-012-<br>2:F006-023 | N.D. | 22.5 | 3 | 979.1185 | 2934.3318 | 19996 | 26 | 1/b2;1/y1;1/y2;1/y3;1/y4;1/y5;1/y7;1/y8-2/b9;1/y8-2/b5;1/y8;1/y8-2/b4;1/y8-2/b3;1/y8-2/b8;1/y8-2/b15;1/y8-2/b6;1/y9;1/y10;1/y11;1/y12;1/y13;1/y14;1/y18-2/b4;2/b2;2/b3;2/y2;2/y4 |
| <b>GFSCLLLLTGEIDLPVKRR=APRGFSC</b>  | 1:F002-008-<br>2:F005-023 | N.D. | 22.5 | 3 | 955.4537 | 2863.3372 | 19884 | 24 | 1/b2;1/b3;1/b4;1/b6;1/y7-2/b11;1/y7-2/b5;1/y7-2/b10;1/y7-2/b4;1/y7-2/b9;1/y7-2/y16;2/b2;2/b3;2/y1;2/y2;2/y3;2/y4;2/y5;2/y7;2/y8;2/y9;2/y10;2/y12;2/y13;2/y                       |

|                              |                       |                |      |   |           |           |       |    |                                                                                                                                                           |
|------------------------------|-----------------------|----------------|------|---|-----------|-----------|-------|----|-----------------------------------------------------------------------------------------------------------------------------------------------------------|
| 14                           |                       |                |      |   |           |           |       |    |                                                                                                                                                           |
| LLLTGEIDLPVKRRA              | 1:F010-024            | N.D.           | 22.5 | 2 | 847.5186  | 1693.0212 | 19437 | 16 | b2;b3;b4;b5;b6;b9;b10;b11;b13;b14;y2;y3;y4;y5;y12;y14                                                                                                     |
| APRGFSCLLLL=MAPRGFSCLLLLTGE  | 1:F001-015-2:F002-012 | N.D.           | 22.5 | 3 | 932.1207  | 2793.3381 | 16728 | 19 | 1/b2;1/b3;1/b4;1/b6;1/y2;1/y4;1/y5-2/y15;1/y7-2/y15;1/y11-2/y11;1/y11-2/b13;2/b2;2/b3;2/b4;2/b5;2/b6;2/y2;2/y3;2/y4;2/y6                                  |
| MAPRGFSCLLLLTGEIDLPVKRR=CL   | 1:F001-023-2:F008-009 | N.D.           | 22.5 | 3 | 939.7855  | 2816.3325 | 16706 | 23 | 1/y2-2/b12;1/y2-2/b10;1/y2-2/b21;1/y2-2/y18;1/y2-2/b8;1/y2-2/b13;2/b2;2/b3;2/b4;2/b5;2/b6;2/y1;2/y2;2/y3;2/y4;2/y5;2/y7;2/y8;2/y9;2/y10;2/y12;2/y13;2/y14 |
| APRGFSCLLLLTG                | 1:F002-014            | N.D.           | 28.1 | 1 | 1347.8843 | 1346.8763 | 16614 | 5  | b4;b7;y4;y6;y7                                                                                                                                            |
| MAPRGFSCLLLL                 | 1:F001-012*           | Oxidation M(1) | 22.5 | 2 | 668.8843  | 1335.7527 | 16532 | 7  | b3*;b4*;b10*;y2;y4;y5;y10                                                                                                                                 |
| APRGFSCLLLLTGEIDLPVKRRA      | 1:F002-024            | N.D.           | 21.9 | 4 | 632.1149  | 2524.4277 | 16143 | 18 | b4;b6;b7;b8;b9;b10;b11;b22;y2;y6;y7;y8;y9;y10;y13;y14;y15;y22                                                                                             |
| PRGFSCLLLLTG=PRGFSCLLLLTGEID | 1:F003-014-2:F003-017 | N.D.           | 22.5 | 3 | 969.779   | 2906.3132 | 15813 | 17 | 1/b3;1/b4;1/b5;1/b10-2/y12;1/y2;1/y3;1/y5;1/y6;1/y12-2/b6;1/y12-2/b11;1/y15-2/b8;1/y15-2/b6;2/y2;2/y3;2/y6;2/y7;2/y8                                      |
| APRGFSCLLLLTGEIDLPVKR=CLLLLT | 1:F002-022-2:F008-013 | N.D.           | 22.5 | 3 | 990.7751  | 2969.3015 | 15495 | 19 | 1/b3;1/b4;1/b6;1/y1;1/y2;1/y3;1/y6-2/y19;1/y6-2/y16;1/y6-2/b11;1/y6-2/b10;1/y6-2/b9;1/y9;1/y11;1/y14;2/y1;2/y2;2/y3;2/y4;2/y5                             |
| RGFSCLLLLTGEID=RGFSCLLLLTGE  | 1:F004-015-2:F004-017 | N.D.           | 22.5 | 3 | 948.1182  | 2841.3308 | 15283 | 17 | 1/b1;1/y2;1/y3;1/y4;1/y6;2/b2;2/b3;2/b4;2/y2;2/y3;2/y6;2/y7;2/y8;2/y12-1/b10;2/y12-1/b6;2/y12-1/b13;2/y14-1/b8                                            |
| MAPRGFSCLLLLTGEID=CLLLLTGE   | 1:F001-017-2:F008-015 | N.D.           | 21.9 | 4 | 674.3597  | 2693.407  | 15033 | 8  | 1/b7-2/y17;1/y8-2/y16;1/y8-2/b11;2/b2;2/b3;2/b4;2/b5;2/b7                                                                                                 |
| RGFSCLLLLTGEIDLPVKRR=FSCL    | 1:F004-023-2:F006-009 | N.D.           | 22.5 | 3 | 918.1212  | 2751.3396 | 14935 | 22 | 1/b2;1/y4-2/b18;1/y4-2/b5;1/y4-2/b17;1/y4-2/b10;1/y16-2/y4;2/b1;2/b2;2/b3;2/b4;2/y1;2/y2;2/y3;2/y4;2/y5;2/y7;2/y8;2/y9;2/y10;2/y12;2/y13;2/y14            |

|                                        |                           |                   |      |   |           |           |       |    |                                                                                                                                              |
|----------------------------------------|---------------------------|-------------------|------|---|-----------|-----------|-------|----|----------------------------------------------------------------------------------------------------------------------------------------------|
| <b>GFSCLLLLLTGEIDLPVKRR=APRGFSCL</b>   | 1:F002-009-<br>2:F005-023 | N.D.              | 22.5 | 3 | 993.1191  | 2976.3335 | 14257 | 21 | 1/b3;1/b4;1/b6;1/y8-2/b4;1/y8-2/b16;1/y8-2/y18;1/y8-2/b9;1/y8-2/b10;2/b2;2/b3;2/y1;2/y2;2/y3;2/y4;2/y5;2/y7;2/y8;2/y9;2/y12;2/y13;2/y14      |
| <b>GFSCLLLLLTGEIDLPVKRR=GFSCLLL</b>    | 1:F005-011-<br>2:F005-023 | N.D.              | 22.5 | 3 | 960.4471  | 2878.3174 | 12406 | 21 | 1/b2;1/y2;2/b3;2/y1;2/y2;2/y3;2/y4;2/y5;2/y7-1/b7;2/y7-1/b8;2/y7;2/y7-1/b4;2/y7-1/b5;2/y7-1/b12;2/y7-1/b10;2/y8;2/y9;2/y10;2/y12;2/y13;2/y14 |
| <b>CLLLLLTGEIDL</b>                    | 1:F008-018*               | Oxidation<br>C(1) | 22.5 | 2 | 609.8526  | 1217.6893 | 12399 | 13 | b3*;b4*;b5*;b6*;b7*;b8*;b10*;y2;y3;y4;y6;y7;y8                                                                                               |
| <b>TGEIDLPVKRRA</b>                    | 1:F013-024                | N.D.              | 21.9 | 2 | 677.8922  | 1353.7686 | 12169 | 12 | b2;b3;b4;b5;b6;b11;y2;y6;y7;y8;y9;y10                                                                                                        |
| <b>MAPRGFSCLLLLLTGEIDLPVKRRA</b>       | 1:F001-024                | N.D.              | 23.6 | 5 | 532.1014  | 2655.4675 | 12162 | 9  | b4;b9;y10;y11;y12;y13;y14;y15;y22                                                                                                            |
| <b>RGFSCLLLL</b>                       | 1:F004-012                | N.D.              | 22.5 | 1 | 1021.4427 | 1020.4348 | 11792 | 8  | b2;b3;b4;b5;b8;y2;y4;y5                                                                                                                      |
| <b>GFSCLLLLLTGE=GFSC</b>               | 1:F005-008-<br>2:F005-015 | N.D.              | 22.5 | 2 | 781.9707  | 1561.9255 | 11010 | 9  | 1/b3;1/b7-2/y4;1/y4-2/b10;1/y4-2/b6;1/y4-2/b8;2/y2;2/y3;2/y4;2/y6                                                                            |
| <b>PRGFSCLLLLLTGEIDLPVKR=SCLLLL</b>    | 1:F003-022-<br>2:F007-012 | N.D.              | 22.5 | 3 | 962.4517  | 2884.3313 | 10944 | 17 | 1/b3;1/b4;1/b5;1/y1;1/y2;1/y3;1/y6-2/b12;1/y6-2/b11;1/y6-2/b6;1/y6-2/b9;1/y6-2/b8;1/y6-2/b14;1/y9;1/y11;1/y14;2/y2;2/y4                      |
| <b>APRGFSCLLLL=MAPRGFSCLLLLLTG</b>     | 1:F001-014-<br>2:F002-012 | N.D.              | 22.5 | 5 | 533.9536  | 2664.728  | 10928 | 16 | 1/b2;1/b3;1/b4;1/b6;1/y2;1/y4;1/y11-2/y12;1/y11-2/b13;2/b2;2/b3;2/b5;2/b6;2/y2;2/y3;2/y5;2/y6                                                |
| <b>RGFSC=FSCLLLLLTGEIDLPVKRRA</b>      | 1:F004-008-<br>2:F006-024 | N.D.              | 22.5 | 3 | 904.1339  | 2709.3777 | 10727 | 16 | 1/b2;1/y3;1/y4;1/y5-2/b10;1/y5-2/b4;1/y5;1/y5-2/b8;1/y5-2/b9;1/y5-2/b17;1/y12;1/y14;1/y15;2/b1;2/b2;2/b3;2/b4                                |
| <b>APRGFSCLLLL=FSCLLLLLTGEIDLPVK</b>   | 1:F002-012-<br>2:F006-021 | N.D.              | 22.5 | 3 | 983.1032  | 2946.2859 | 10600 | 14 | 1/b2;1/b3;1/b4;1/b6;1/y2;1/y4;1/y8-2/y16;1/y11-2/b5;1/y16-2/b8;1/y16-2/b7;2/b2;2/y3;2/y10;2/y12                                              |
| <b>SCLLLLLTGEI=SCLLLLLTGEIDLPVKRRA</b> | 1:F007-016-<br>2:F007-024 | N.D.              | 22.5 | 3 | 1019.0975 | 3054.2688 | 10586 | 14 | 1/y3;1/y4;1/y6;1/y10-2/b8;1/y10-2/b9;1/y10-2/b4;1/y10-2/b6;1/y10-2/b7;2/y3;2/y4;2/y5;2/y12;2/y14;2/y15                                       |
| <b>MAPRGFSCLL=MAPRGFSCLLLLLTGEIDL</b>  | 1:F001-010-<br>2:F001-018 | N.D.              | 22.5 | 3 | 1014.1144 | 3039.3196 | 9817  | 15 | 1/b2;1/y2;1/y3-2/y18;1/y9-2/y18;1/y10-2/b8;1/y10-2/y16;2/b3;2/b5;2/b6;2/y2;2/y3;2/y4;2/y                                                     |

|                                       |                           |      |      |   |           |           |      |    |                                                                                                                                                                                                       |
|---------------------------------------|---------------------------|------|------|---|-----------|-----------|------|----|-------------------------------------------------------------------------------------------------------------------------------------------------------------------------------------------------------|
| 6;2/y7;2/y8                           |                           |      |      |   |           |           |      |    |                                                                                                                                                                                                       |
| <b>GFSCLLLLLTGEIDLPVKRR=GFSCLLLL</b>  | 1:F005-012-<br>2:F005-023 | N.D. | 22.5 | 3 | 998.1039  | 2991.2881 | 9790 | 23 | 1/b2;1/y2;1/y4;1/y8-2/b15;1/y8-2/b6;1/y8-2/b7;1/y8-2/b8;1/y8-2/b10;1/y8-2/b4;1/y8-2/b11;1/y19-2/b7;2/b3;2/y1;2/y2;2/y3;2/y4;2/y5;2/y7;2/y9;2/y10;2/y12;2/y13;2/y14                                    |
| <b>APRGFSCLLLLLTGEI</b>               | 1:F002-016                | N.D. | 22.5 | 2 | 795.4114  | 1588.807  | 9764 | 12 | b2;b3;b4;b6;b11;b12;b14;y3;y4;y6;y12;y14                                                                                                                                                              |
| <b>APRGFSCLLLLLTGEIDLPVKRR=FSCLLL</b> | 1:F002-023-<br>2:F006-011 | N.D. | 22.5 | 3 | 1049.4358 | 3145.2834 | 9612 | 26 | 1/b2;1/b3;1/b4;1/b6;1/y1;1/y2;1/y3;1/y4;1/y5;1/y6-2/b14;1/y6-2/b10;1/y6-2/b7;1/y6-2/b21;1/y6-2/b16;1/y6-2/b12;1/y7;1/y9;1/y10;1/y11;1/y12;1/y13;1/y14;1/y22-2/b5;1/y22-2/b3;2/b2;2/y2                 |
| <b>APRGFSCLLLLLTGEIDLPVKRR=FSCLL</b>  | 1:F002-023-<br>2:F006-010 | N.D. | 22.5 | 3 | 1011.7664 | 3032.2754 | 9520 | 27 | 1/b2;1/b3;1/b4;1/b6;1/y1;1/y2;1/y3;1/y4;1/y5-2/y17;1/y5-2/b15;1/y5-2/b11;1/y5-2/b13;1/y5;1/y5-2/y19;1/y5-2/b21;1/y5-2/b8;1/y5-2/b17;1/y7;1/y9;1/y10;1/y12;1/y13;1/y14;1/y22-2/b3;1/y22-2/y4;2/b2;2/y2 |
| <b>PVKRRA</b>                         | 1:F019-024                | N.D. | 22.5 | 1 | 726.4699  | 725.462   | 9246 | 5  | b3;b5;y3;y4;y5                                                                                                                                                                                        |
| <b>FSC=RGFSCLLLLLTGEIDLPVKRRA</b>     | 1:F004-024-<br>2:F006-008 | N.D. | 22.1 | 4 | 678.3609  | 2709.4119 | 9122 | 9  | 2/y2;2/y6;2/y7;2/y8;2/y9;2/y10;2/y13;2/y14;2/y15                                                                                                                                                      |
| <b>RGFSCLLLLT=PRGFSCLLLLLTGEIDLP</b>  | 1:F003-019-<br>2:F004-013 | N.D. | 22.5 | 3 | 988.4335  | 2962.2766 | 8979 | 19 | 1/b3;1/b14-2/y10;1/y3;1/y6;1/y7;1/y8;1/y9;1/y10-2/b8;1/y17-2/b6;1/y17-2/y7;2/b1;2/b2;2/b3;2/b4;2/y1;2/y2;2/y3;2/y4;2/y5                                                                               |
| <b>RGFSCLLLLLTGEIDLPVKRRA=SC</b>      | 1:F004-024-<br>2:F007-008 | N.D. | 22.5 | 4 | 641.6015  | 2562.3743 | 8899 | 19 | 1/b1;1/b2;1/b3;1/b4;1/y2-2/b14;1/y2-2/b9;1/y2-2/b15;1/y2-2/b12;1/y2-2/b7;1/y2-2/b13;1/y2-2/b8;1/y2-2/b10;1/y3;1/y4;1/y5;1/y12;1/y14;1/y15;1/y20-2/y2                                                  |
| <b>EIDLPV</b>                         | 1:F015-020                | N.D. | 22.5 | 1 | 685.3515  | 684.3436  | 8683 | 5  | b1;b2;b3;b4;b5                                                                                                                                                                                        |
| <b>PRGFSCLLLLLTGEIDLPVKRRA</b>        | 1:F003-024                | N.D. | 21.7 | 4 | 614.3555  | 2453.3904 | 8414 | 7  | b7;b8;b9;y7;y11;y12;y14                                                                                                                                                                               |
| <b>MAPRGFSCLLLLLTGE=FSCLLLLLTGE</b>   | 1:F001-015-<br>2:F006-015 | N.D. | 21.9 | 3 | 900.8144  | 2699.4194 | 8350 | 5  | 2/b2;2/b3;2/b4;2/b5;2/b7                                                                                                                                                                              |

|                                      |                           |      |      |   |           |           |      |    |                                                                                                                                                                                                    |
|--------------------------------------|---------------------------|------|------|---|-----------|-----------|------|----|----------------------------------------------------------------------------------------------------------------------------------------------------------------------------------------------------|
| <b>SC=CLLLLTG</b>                    | 1:F007-008-<br>2:F008-014 | N.D. | 22.5 | 1 | 938.4548  | 937.4469  | 8111 | 6  | 1/y1-2/y7;1/y2-2/b5;1/y2;1/y3;1/y5;1/y6                                                                                                                                                            |
| <b>RGFSCLLLLTGEID=RGFSCLLLLT</b>     | 1:F004-013-<br>2:F004-017 | N.D. | 22.5 | 5 | 532.0209  | 2655.0649 | 7932 | 18 | 1/b1;1/b4;1/y1;1/y2;1/y3;1/y4;1/y5;2/b2<br>;2/b3;2/y2;2/y3;2/y6;2/y7;2/y8;2/y10-<br>1/b12;2/y10-1/b6;2/y10-1/b5;2/y14-<br>1/b8                                                                     |
| <b>GEIDLVPKRRRA</b>                  | 1:F014-024                | N.D. | 21.9 | 2 | 627.3687  | 1252.7214 | 7832 | 10 | b2;b3;b4;b5;b7;y2;y6;y8;y9;y10                                                                                                                                                                     |
| <b>PRGFSCLLLLTGE=FSCLLLLTGEIDL</b>   | 1:F003-015-<br>2:F006-018 | N.D. | 22.5 | 3 | 947.1171  | 2838.3276 | 7724 | 18 | 1/b2;1/y2;1/y3;1/y4;1/y6;1/y7;1/y8;1/y1<br>3-2/b9;1/y13-2/b4;1/y13-2/b8;1/y13-<br>2/b12;1/y13-2/b3;1/y13-<br>2/b5;2/b3;2/y2;2/y3;2/y4;2/y6                                                         |
| <b>GFSCLLLLTGEID=MAPRGFSCLLLLTGE</b> | 1:F001-015-<br>2:F005-017 | N.D. | 22.5 | 3 | 995.7682  | 2984.281  | 7464 | 20 | 1/b3;1/y2;1/y3;1/y6;1/y7;1/y8;1/y13-<br>2/b11;1/y13-2/b8;1/y13-2/b14;1/y13-<br>2/b13;1/y14-2/y13;1/y15-<br>2/b7;2/b2;2/b3;2/b5;2/b6;2/y2;2/y3;2/y<br>4;2/y6                                        |
| <b>FSCLLLLT=FSCLLLLTGEIDLVPKRRRA</b> | 1:F006-013-<br>2:F006-024 | N.D. | 22.5 | 3 | 1017.4348 | 3049.2805 | 6978 | 17 | 1/b2;1/y1;1/y2;1/y3;1/y4;1/y5;1/y8-<br>2/b14;1/y8-2/b7;1/y8-2/b6;1/y8-<br>2/b8;1/y8-<br>2/b3;2/y3;2/y4;2/y5;2/y12;2/y14;2/y15                                                                      |
| <b>RGFSCLLLLTGEIDLVPKRR=SC</b>       | 1:F004-023-<br>2:F007-008 | N.D. | 22.5 | 4 | 623.8429  | 2491.3398 | 6881 | 24 | 1/b1;1/b2;1/b3;1/b4;1/y1;1/y2-<br>2/b14;1/y2-2/b9;1/y2-2/b15;1/y2-<br>2/b12;1/y2-2/b7;1/y2-2/b13;1/y2;1/y2-<br>2/b8;1/y2-<br>2/b10;1/y3;1/y4;1/y5;1/y7;1/y9;1/y10;1/<br>y11;1/y12;1/y14;1/y18-2/y2 |
| <b>LPVKRRRA</b>                      | 1:F018-024                | N.D. | 22.5 | 2 | 420.2817  | 838.5475  | 6841 | 8  | b2;b3;b4;b5;b6;y3;y4;y5                                                                                                                                                                            |
| <b>PRGFSCLLLLTGEIDLVPKR=CLLLLTG</b>  | 1:F003-022-<br>2:F008-014 | N.D. | 22.5 | 3 | 986.1235  | 2955.3467 | 6680 | 17 | 1/y2;1/y3;1/y5;1/y6;1/y7-2/y19;1/y7-<br>2/b11;1/y7-2/b9;1/y7-2/b8;1/y7-<br>2/y18;1/y7-<br>2/b10;2/b3;2/y1;2/y2;2/y3;2/y9;2/y11;2/<br>y14                                                           |
| <b>MAPRGFSCL=MAPRGFSCLLLLTGEIDL</b>  | 1:F001-009-<br>2:F001-018 | N.D. | 22.5 | 3 | 976.4437  | 2926.3071 | 6478 | 11 | 1/b3;1/b5;2/b6;2/y2;2/y3;2/y4;2/y6;2/y7<br>;2/y8;2/y9-1/b9;2/y9-1/b8                                                                                                                               |
| <b>FSCLLLLTGEIDLVPKRR=CLLLLTGE</b>   | 1:F006-023-<br>2:F008-015 | N.D. | 22.5 | 3 | 977.7795  | 2930.3147 | 6414 | 24 | 1/b5-2/y8;1/b6-<br>2/y8;1/y2;1/y3;1/y4;1/y6;1/y8-<br>2/b14;1/y8-2/b16;1/y8-2/b13;1/y8-<br>2/b8;1/y8-2/b7;1/y8-2/b17;1/y18-<br>2/b1;2/b2;2/y1;2/y2;2/y3;2/y4;2/y5;2/y7                              |

|                                      |                       |                |      |   |           |           |      |    |                                                                                                                                            |
|--------------------------------------|-----------------------|----------------|------|---|-----------|-----------|------|----|--------------------------------------------------------------------------------------------------------------------------------------------|
|                                      |                       |                |      |   |           |           |      |    | ;2/y9;2/y10;2/y12;2/y14                                                                                                                    |
| <b>LTGEIDLPVKRRA</b>                 | 1:F012-024            | N.D.           | 21.9 | 2 | 734.4342  | 1466.8525 | 6376 | 8  | b2;b4;b6;y2;y6;y8;y9;y10                                                                                                                   |
| <b>RGFSCLLLLTGE=SCLLLLTGEIDLPVKR</b> | 1:F004-015-2:F007-022 | N.D.           | 22.5 | 3 | 1025.756  | 3074.2441 | 6215 | 20 | 1/b1;1/b2;1/b3;1/b4;1/y2;1/y3;1/y4;1/y6;1/y9-2/y16;1/y12-2/b15;1/y12-2/b2;1/y12-2/b6;1/y12-2/b3;1/y12-2/b5;2/y1;2/y2;2/y3;2/y9;2/y11;2/y14 |
| <b>TGEIDLPVKRRA</b>                  | 1:F013-024            | N.D.           | 22.1 | 2 | 677.8928  | 1353.7698 | 5915 | 8  | b2;b3;b4;y2;y6;y8;y9;y10                                                                                                                   |
| <b>MAPRGFSCLLLLTGEIDLPVKR=CLL</b>    | 1:F001-022-2:F008-010 | N.D.           | 22.5 | 3 | 925.455   | 2773.3411 | 5814 | 12 | 1/y2;1/y3-2/b11;1/y3-2/b9;1/y3-2/y19;2/b3;2/b5;2/b6;2/y2;2/y3;2/y9;2/y11;2/y14                                                             |
| <b>APRGFSCLLLLTGEIDLPVK=CLLLL</b>    | 1:F002-021-2:F008-012 | N.D.           | 22.5 | 3 | 905.136   | 2712.3843 | 5753 | 15 | 1/b2;1/b4;1/y3;1/y5-2/y18;1/y5-2/b12;1/y5-2/b19;1/y5-2/b10;1/y5-2/b11;1/y5-2/b13;1/y5-2/b9;1/y10;1/y12;1/y20-2/b3;2/y2;2/y4                |
| <b>GFSCLLLLTGEID=PRGFSCLLLLTGEID</b> | 1:F003-017-2:F005-017 | N.D.           | 22.5 | 3 | 1004.4337 | 3010.2773 | 5753 | 8  | 1/b2;1/b3;1/y2;2/b3;2/y3;2/y6;2/y7;2/y8                                                                                                    |
| <b>SCL=CLLLLLT</b>                   | 1:F007-009-2:F008-013 | N.D.           | 22.5 | 1 | 994.4475  | 993.4396  | 5635 | 6  | 1/y1;1/y2;1/y3-2/b4;1/y3;1/y4;1/y5                                                                                                         |
| <b>FSC=CLLLLLTGEID</b>               | 1:F006-008-2:F008-017 | N.D.           | 22.5 | 2 | 721.8849  | 1441.7539 | 5494 | 8  | 1/y2;1/y3-2/b6;1/y3;1/y6;1/y7;1/y8;1/y10-2/y2;2/b2                                                                                         |
| <b>PRGFSCLLLLT</b>                   | 1:F003-013*           | Oxidation C(1) | 22.5 | 2 | 618.3611  | 1234.7064 | 5130 | 13 | b3;b8*;b9*;b10*;y1;y2;y3;y4;y5;y6*;y7*;y8*;y9*                                                                                             |
| <b>RGFSCLLL=SCLLLLTGEIDLPVKRRA</b>   | 1:F004-011-2:F007-024 | N.D.           | 22.5 | 3 | 968.1096  | 2901.3049 | 5055 | 17 | 1/b1;1/b2;1/b3-2/y8;1/b3;1/b4;1/y2;1/y8-2/b5;1/y8-2/b4;1/y8-2/b10;1/y8-2/b9;1/y8-2/b2;1/y8-2/b8;1/y18-2/b5;2/y4;2/y12;2/y14;2/y15          |

\*The symbol “=” represents the dimerization via disulfide bonds between two peptide sequences. The first row is the dimerized HNG peptide while the remaining sequences are the dimerized HNG fragments. RT; Retention time, Min; Minutes.
