# Supplementary material for: Stability Determination of Intact Humanin-G with Characterizations of Oxidation and Dimerization Patterns
Source: MDPI journal article supplement (doi:10.3390/biom13030515), 2023-03-11
Supplement: s1 [file s1]

**Table S3.** Amino acid sequences and mass spectrometric analytical properties of HNG in HPLC water at 11 months. Dimerized HNG and dimerized HNG fragments are ordered by intensity (counts).

| Peptide                                                  | Label                     | Modifier | RT (Min) | Control Charge State | Control m/z | Control Mass (Da) | Control Intensity (Counts) | Control b/y Found | Control b/y List                                                                                                                                                                                                                  |
|----------------------------------------------------------|---------------------------|----------|----------|----------------------|-------------|-------------------|----------------------------|-------------------|-----------------------------------------------------------------------------------------------------------------------------------------------------------------------------------------------------------------------------------|
| <b>MAPRGFSCLLLLTGEIDLPVKRRA=MAPRGFSCLLLLTGEIDLPVKRRA</b> | 1:F001-024-<br>2:F001-024 | N.D.     | 24.3     | 7                    | 759.4249    | 5308.9189         | 1067924                    | 30                | 1/b6;1/b7;1/y2;1/y4;1/y6;1/y8;1/y9;1/y10;1/y14;1/y15;1/y24-2/y22;1/y24-2/b12;1/y24-2/b23;1/y24-2/b17;1/y24-2/b10;1/y24-2/b15;1/y24-2/b9;1/y24-2/b11;1/y24-2/b13;1/y24-2/y21;2/b2;2/b3;2/b4;2/b5;2/y5;2/y7;2/y11;2/y12;2/y13;2/y16 |
| <b>MAPRGFSCLLLLTGEIDLPVKRRA</b>                          | 1:F001-024                | N.D.     | 22.6     | 4                    | 664.8752    | 2655.469          | 29714                      | 10                | b8;b9;b10;b11;y7;y9;y11;y12;y13;y14                                                                                                                                                                                               |
| <b>TGEIDLPVKRRA</b>                                      | 1:F013-024                | N.D.     | 24.3     | 2                    | 677.8915    | 1353.7671         | 12655                      | 12                | b2;b3;b4;b5;b6;b10;b11;y2;y4;y5;y6;y10                                                                                                                                                                                            |
| <b>FSCL=GFSCLLLLTGEIDLPVKRRA</b>                         | 1:F005-024-<br>2:F006-009 | N.D.     | 24.3     | 3                    | 889.657     | 2665.9473         | 11790                      | 12                | 1/y4-2/b10;1/y4-2/b7;1/y17-2/y4;2/y2;2/y4;2/y5;2/y6;2/y10;2/y12;2/y14;2/y15;2/y16                                                                                                                                                 |
| <b>GFSCLLLLTGEIDLP=MAPRGFSCLL</b>                        | 1:F001-010-<br>2:F005-019 | N.D.     | 24.3     | 3                    | 894.813     | 2681.4153         | 11469                      | 9                 | 1/y2;1/y10;1/y11;2/b2;2/b3;2/b4;2/b5;2/b6;2/b7                                                                                                                                                                                    |
| <b>APRGFSC=MAPRGFSCLLLLTGEIDL</b>                        | 1:F001-018-<br>2:F002-008 | N.D.     | 24.3     | 3                    | 894.9783    | 2681.9111         | 10492                      | 12                | 1/b4;1/b6;1/y7-2/b12;1/y7-2/b11;1/y18-2/y6;2/b2;2/b3;2/b4;2/b5;2/b6;2/b7;2/y8                                                                                                                                                     |
| <b>GEIDLPVKRRA</b>                                       | 1:F014-024                | N.D.     | 24.3     | 2                    | 627.3692    | 1252.7225         | 8465                       | 10                | b2;b3;b4;b5;b7;b10;y2;y4;y5;y10                                                                                                                                                                                                   |
| <b>RGFSCLL=CLLLLT</b>                                    | 1:F004-010-<br>2:F008-013 | N.D.     | 24.3     | 2                    | 734.4342    | 1466.8525         | 5275                       | 7                 | 1/y6-2/b6;1/y6-2/y4;1/y6-2/b5;1/y6-2/y6;1/y7-2/b1;1/y7-2/b5;1/y7-2/b4                                                                                                                                                             |
| <b>LTGEIDLPVKRRA</b>                                     | 1:F012-024                | N.D.     | 24.3     | 2                    | 734.4342    | 1466.8525         | 5275                       | 10                | b2;b4;b5;b6;b7;b12;y2;y4;y5;y12                                                                                                                                                                                                   |

The symbol “=” represents the dimerization via disulfide bonds between two peptide sequences. The first row is the dimerized HNG peptide while the remaining sequences are the dimerized HNG fragments. N.D.; Not detected. RT; Retention time, Min; Minutes.
