# Supplementary material for: Stability Determination of Intact Humanin-G with Characterizations of Oxidation and Dimerization Patterns
Source: MDPI journal article supplement (doi:10.3390/biom13030515), 2023-03-11
Supplement: s1 [file s1]

**Table S1.** Represent HPLC gradient run for stability assay.

| Time (min) | Flow (mL/min) | % of Solution A | % of Solution B |
|------------|---------------|-----------------|-----------------|
| 0          | 1.00          | 70.0            | 30.0            |
| 10         | 1.00          | 40.0            | 60.0            |
| 12.00      | 1.00          | 40.0            | 60.0            |
| 12.10      | 1.00          | 30.0            | 30.0            |
| 21.00      | 1.00          | 30.0            | 30.0            |

\* Min; Minutes, mL/min; Milliliters per minute.
