# Supplementary material for: Stability Determination of Intact Humanin-G with Characterizations of Oxidation and Dimerization Patterns
Source: MDPI journal article supplement (doi:10.3390/biom13030515), 2023-03-11
Supplement: s1 [file s1]

**Table S2.** Represent UPLC gradient for identification of Humanin-G product.

| Time    | Flow (mL/min) | % of Solution A | % of Solution B | Curve   |
|---------|---------------|-----------------|-----------------|---------|
| Initial | 0.300         | 97.0            | 3.0             | Initial |
| 1.00    | 0.300         | 97.0            | 3.0             | 6       |
| 25.00   | 0.300         | 73.0            | 27.0            | 6       |
| 27.00   | 0.300         | 10.0            | 90.0            | 6       |
| 27.5    | 0.300         | 10              | 90              | 6       |
| 29.00   | 0.300         | 97.0            | 3.0             | 6       |
| 30.00   | 0.050         | 97.0            | 3.0             | 6       |

\* Min; Minutes, mL/min; Milliliters per minute.
